# Supplementary material for: Adjuvant-dependent regulation of interleukin-17 expressing γδ T cells and inhibition of Th2 responses in allergic airways disease
Source: PubMed Central journal article supplement (PMC4151193; doi:10.1186/s12931-014-0090-5), 2014-08-14

SUPPLEMENTAL FIGURE 1

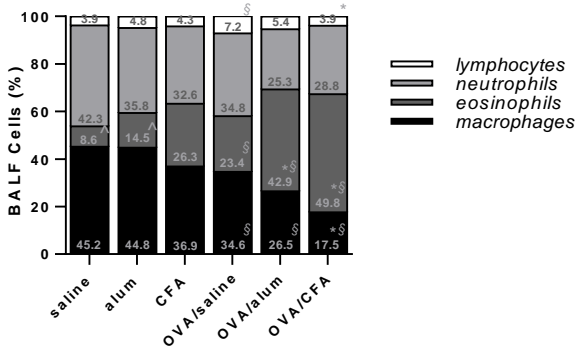

SUPPLEMENTAL FIGURE 2

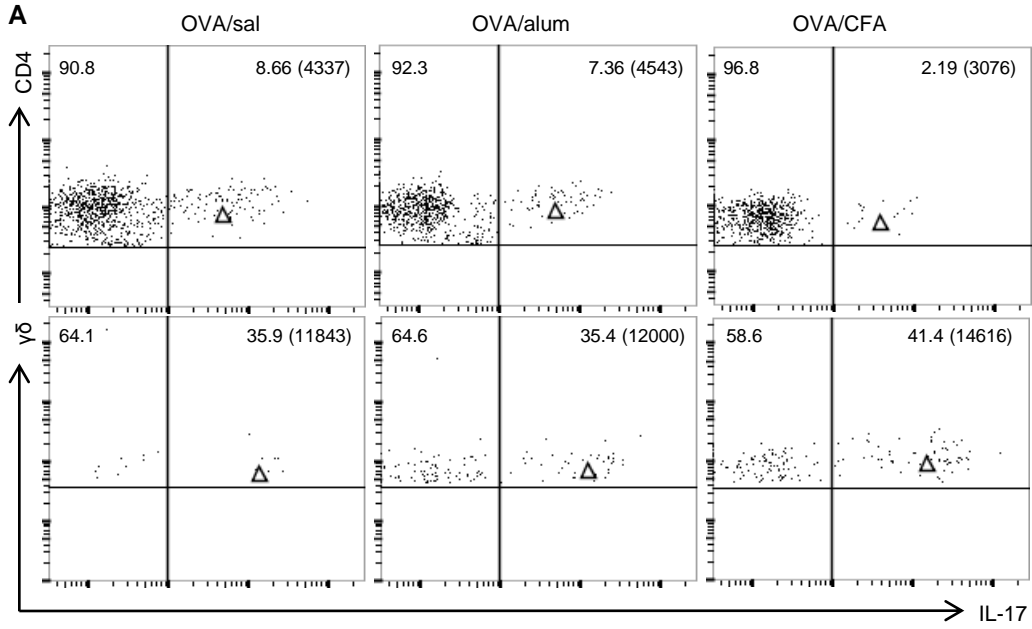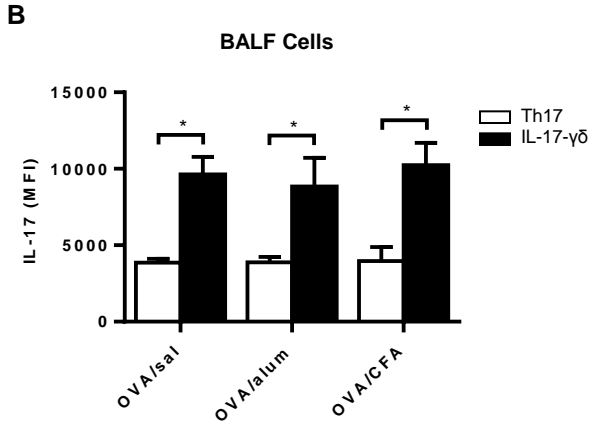

SUPPLEMENTAL FIGURE 3

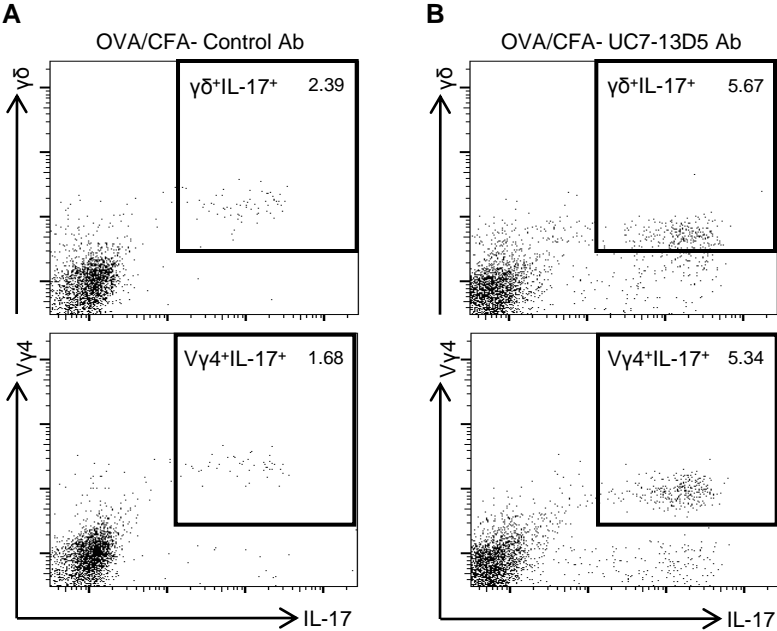

Supplement: 12931_2014_90_MOESM1_ESM.pdf [file 12931_2014_90_MOESM1_ESM.pdf]
